# Supplementary material
Source: HighWire-hosted journal article supplement (https://bibliotheek.ehb.be/content/3/1/e000091)

**Supplementary Figure 1. Centre and Patient recruitment into SeHCAT Prospective Survey**

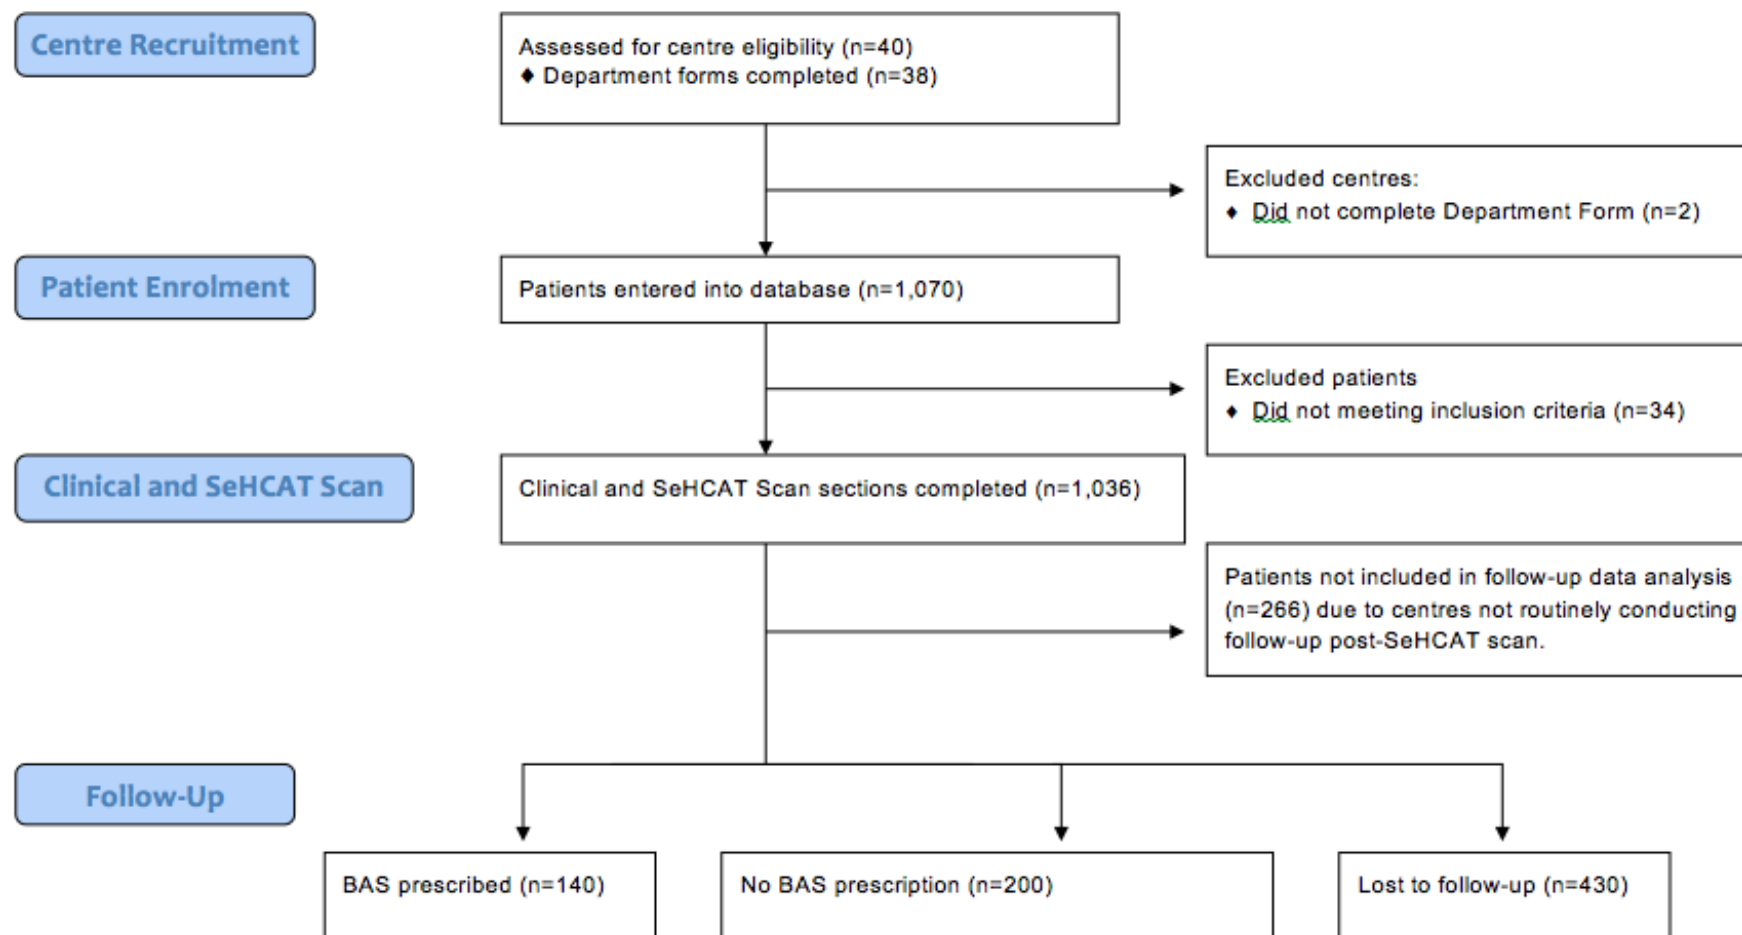

Supplement: inline-supplementary-material-1 [file inline-supplementary-material-1.pdf]
